# Supplementary material for: In vitro patient-derived 3D mesothelioma tumor organoids facilitate patient-centric therapeutic screening
Source: Sci Rep. 2018 Feb 13;8:2886. doi: 10.1038/s41598-018-21200-8 (PMC5811529; doi:10.1038/s41598-018-21200-8)
Supplement: Supplementary file 1 — Supplementary Information [file 41598_2018_21200_MOESM1_ESM.pdf]

## **Supplementary Materials:**

### **In vitro patient-derived 3D mesothelioma tumor organoids facilitate patient-centric therapeutic screening**

Andrea R. Mazzocchi<sup>1,2†</sup>, Shiny A. P. Rajan<sup>1,2†</sup>, Konstantinos I. Votanopoulos<sup>3,4,\*</sup>, Adam R. Hall<sup>1,2,4,\*</sup>, and Aleksander Skardal<sup>1,2,4,5,\*</sup>

<sup>1</sup>Wake Forest Institute for Regenerative Medicine, Wake Forest School of Medicine, Medical Center, Winston-Salem, NC, 27101, USA.

<sup>2</sup>Virginia Tech-Wake Forest School of Biomedical Engineering and Sciences, Wake Forest School of Medicine, Medical Center Boulevard, Winston-Salem, NC, 27157, USA.

<sup>3</sup>Department of Surgery-Surgical Oncology, Wake Forest Baptist Medical Center, Medical Center Boulevard, Winston-Salem, NC, 27157, USA.

<sup>4</sup>Comprehensive Cancer Center at Wake Forest Baptist Medical, Medical Center Boulevard, Winston-Salem, NC, 27157, USA.

<sup>5</sup>Department of Cancer Biology, Wake Forest School of Medicine, Medical Center Boulevard, Winston-Salem, NC, 27157, USA.

<sup>†</sup>These authors contributed equally to this work

\*Correspondence authors, Wake Forest School of Medicine, Medical Center Boulevard, Winston-Salem, NC 27157

E-mail addresses: askardal@wakehealth.edu (A. Skardal); arhall@wakehealth.edu (A. R. Hall); kvotanop@wakehealth.edu (K. I. Votanopoulos)

Supplementary Figures

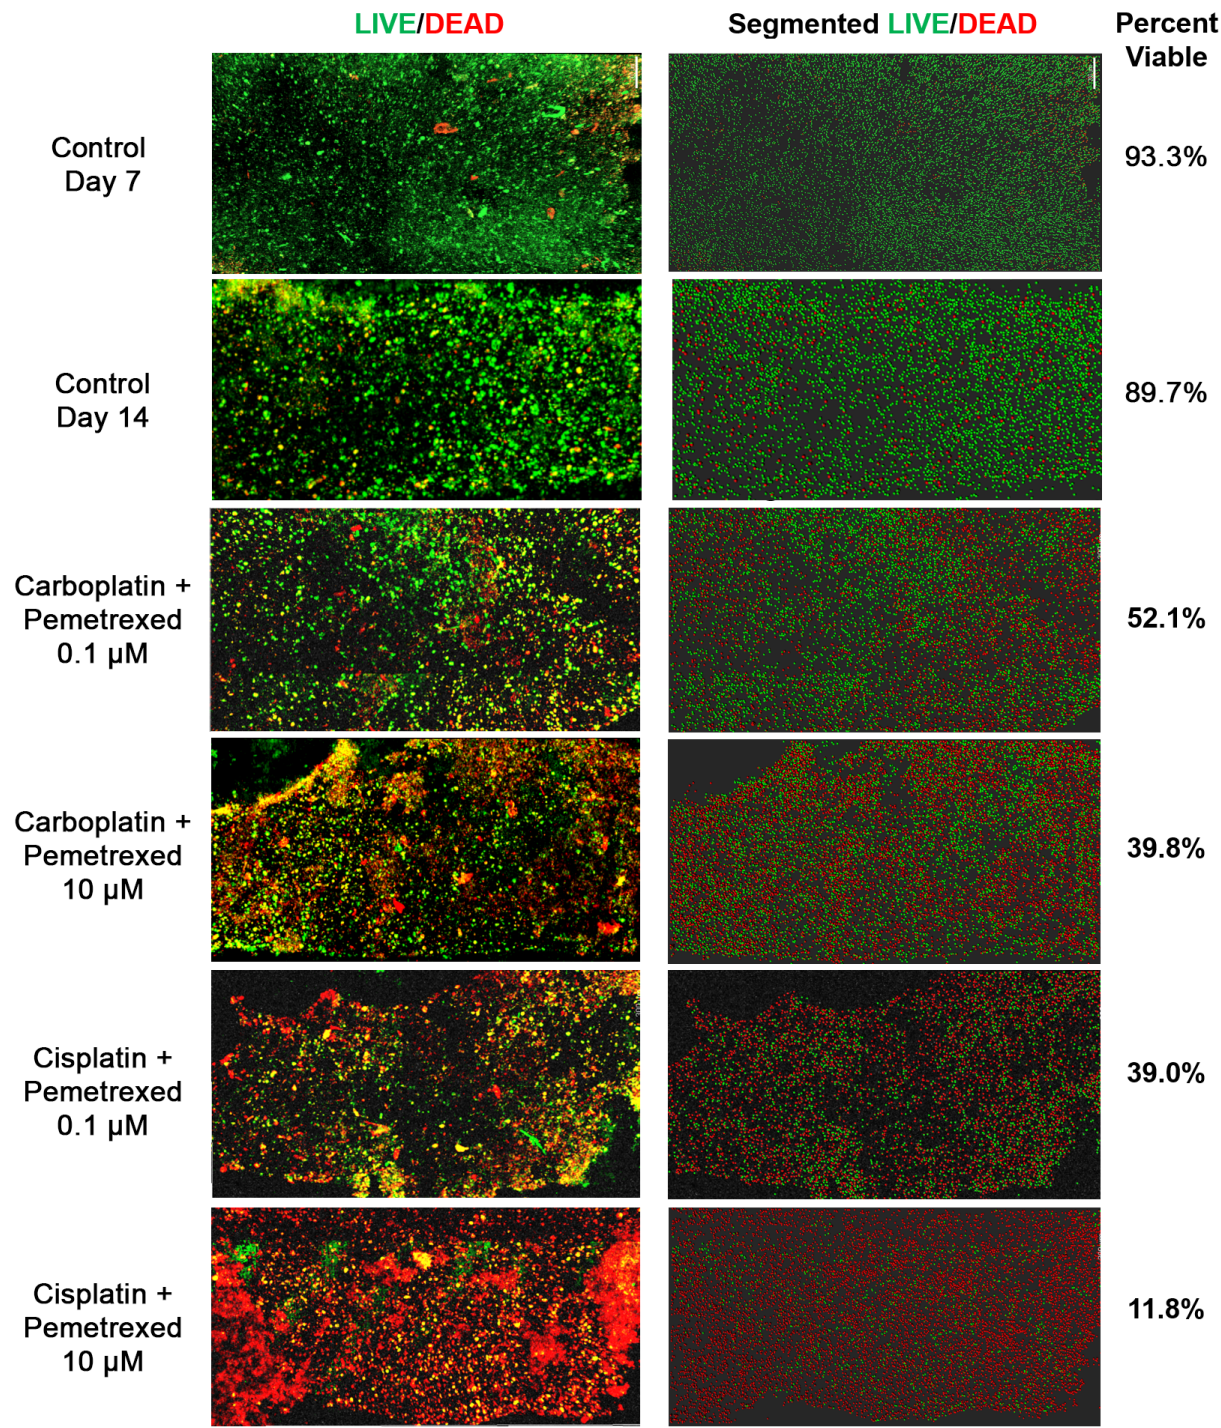

**Supplementary Figure 1. Subject 1 organoid LIVE/DEAD segmentation.** Same data as in Fig. 3a of the main text, but with segmented images resulting from Imaris analysis software, showing live (green) and dead (red) cell positions.

|                                      | LIVE/DEAD                                                                           | Segmented LIVE/DEAD                                                                  | Percent Viable |
|--------------------------------------|-------------------------------------------------------------------------------------|--------------------------------------------------------------------------------------|----------------|
| Control Day 1                        | 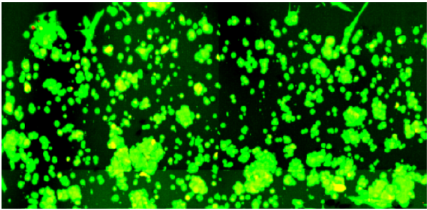   | 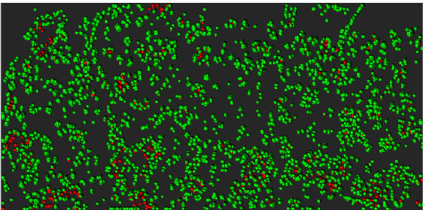   | 83.0%          |
| Control Day 7                        | 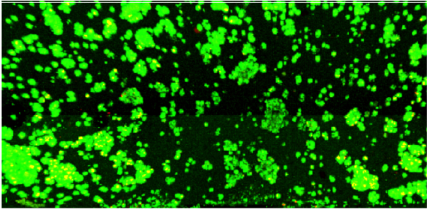   | 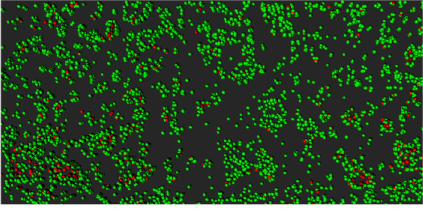   | 87.3%          |
| Carboplatin + Pemetrexed 0.2 $\mu$ M | 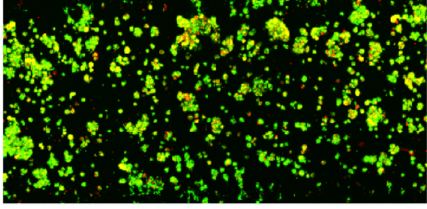   | 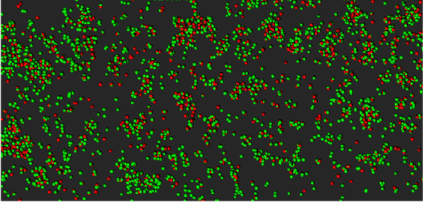   | 57.4%          |
| Carboplatin + Pemetrexed 20 $\mu$ M  | 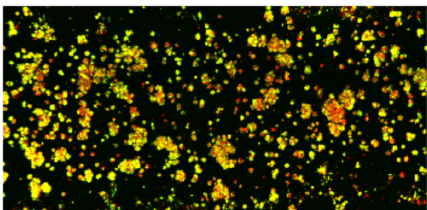  | 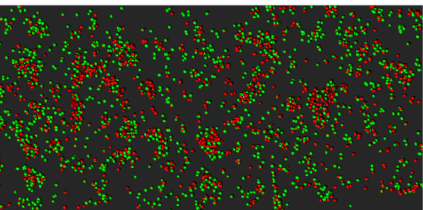  | 42.7%          |
| Cisplatin + Pemetrexed 0.2 $\mu$ M   | 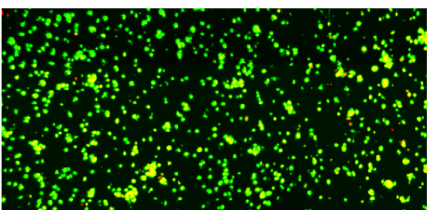 | 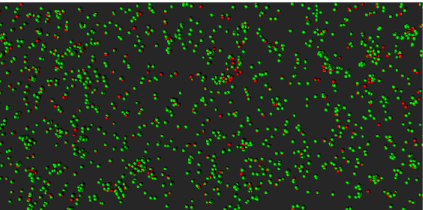 | 65.5%          |
| Cisplatin + Pemetrexed 20 $\mu$ M    | 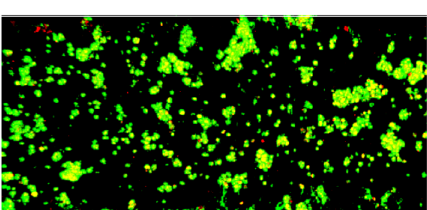 | 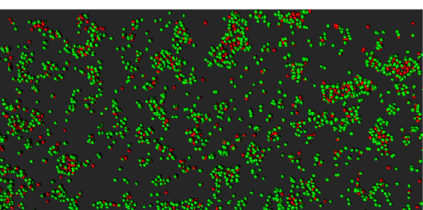 | 64.4%          |

**Supplementary Figure 2. Subject 2 organoid LIVE/DEAD segmentation.** Same data as in Fig. 3c of the main text, but with segmented images resulting from Imaris analysis software, showing live (green) and dead (red) cell positions.
